# Supplementary material for: Inherited Deficiency of Mannan-Binding Lectin–Associated Serine Protease 2
Source: Atypon-hosted journal article supplement (doi:10.1056/nejmoa022836), 2003-08-07
Supplement: nejm_stengaard_554sa1-2.pdf [file nejm_stengaard_554sa1-2.pdf]

# Supplementary Appendix

This appendix has been provided by the authors to give readers additional information about their work.

Supplement to: Stengaard-Pedersen K, Thiel S, Gadjeva M, et al. Inherited Deficiency of Mannan-Binding Lectin-Associated Serine Protease 2. *N Engl J Med* 2003;349:554-60.

**Supplementary Appendix 1. Complement Profile in the Patient.**

| Component                                        | Patient's Value | Reference Value |
|--------------------------------------------------|-----------------|-----------------|
| C1q (% of normal)                                | 11              | 76–136          |
| C4 (g/liter)                                     | 0.06            | 0.12–0.33       |
| C3 (g/liter)                                     | 0.36            | 0.77–1.38       |
| Properdin (% of normal)                          | 54              | 57–153          |
| C1 inhibitor (% of normal)                       | 123             | 72–146          |
| C1 inhibitor function (% of normal)              | 116             | 70–130          |
| C3dg fragments (mg/liter)                        | 13              | <5              |
| Terminal component complexes (SC5b–C9) (U/liter) | 43              | <20             |
| Classic-pathway function (% of normal)*          | 6               | 90–112          |
| Alternative-pathway function (% of normal)†      | 22              | 65–161          |
| Anti-C1q autoantibodies (U/liter)‡               | 55              | <16             |

\* Values reflect the extent of hemolysis of antibody-coated sheep erythrocytes.

† Values reflect the extent of hemolysis of rabbit erythrocytes.

‡ Anti-C1q autoantibodies were determined by enzyme-linked immunosorbent assay. The antibodies were not detectable by Western blot analysis.

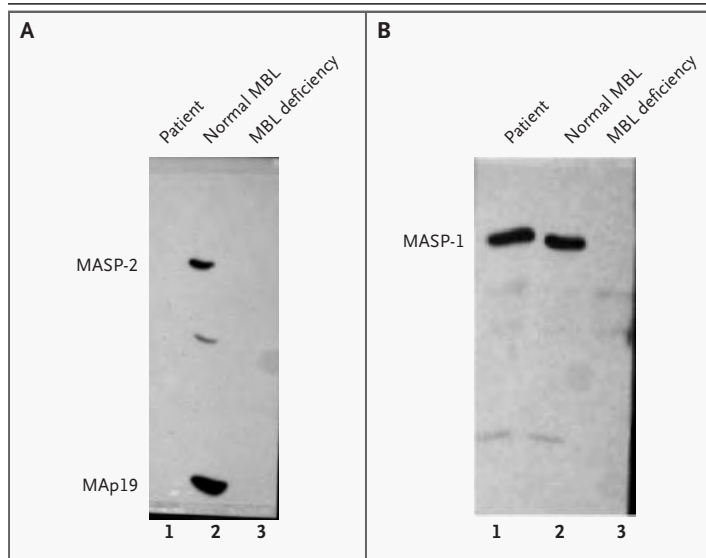

**Supplementary Appendix 2. Western Blot Analysis of Materials Eluted from Anti-Mannan-Binding Lectin-Coated Wells after Incubation with Plasma from the Patient.**

The blots were developed with antibody against MAp19 and mannan-binding lectin-associated serine protease 2 (MASP-2) (Panel A) and antibody against MASP-1 (Panel B). In each panel, lane 1 shows plasma from the patient, lane 2 plasma from a subject with normal levels of mannan-binding lectin (MBL), and lane 3 plasma from a subject with MBL deficiency.
